# Supplementary material
Source: MDPI journal article supplement (https://www.mdpi.com/2079-6412/12/6/831)
Supplement: s1 [file s1]

Supplementary Material:

**Cost-Effective Nanoporous Gold Obtained by Dealloying Metastable Precursor,  $\text{Au}_{33}\text{Fe}_{67}$ , Reveals Excellent Methanol Electro-Oxidation Performance**

Authors: Deepti Raj, Federico Scaglione\*, Gianluca Fiore, Paola Rizzi

Dipartimento di Chimica e Centro Interdipartimentale NIS (Nanostructured Surfaces and Interfaces), Università di Torino, Via Pietro Giuria 7, 10125 Torino, Italy

\*Corresponding Author: Federico Scaglione – federico.scaglione@unito.it

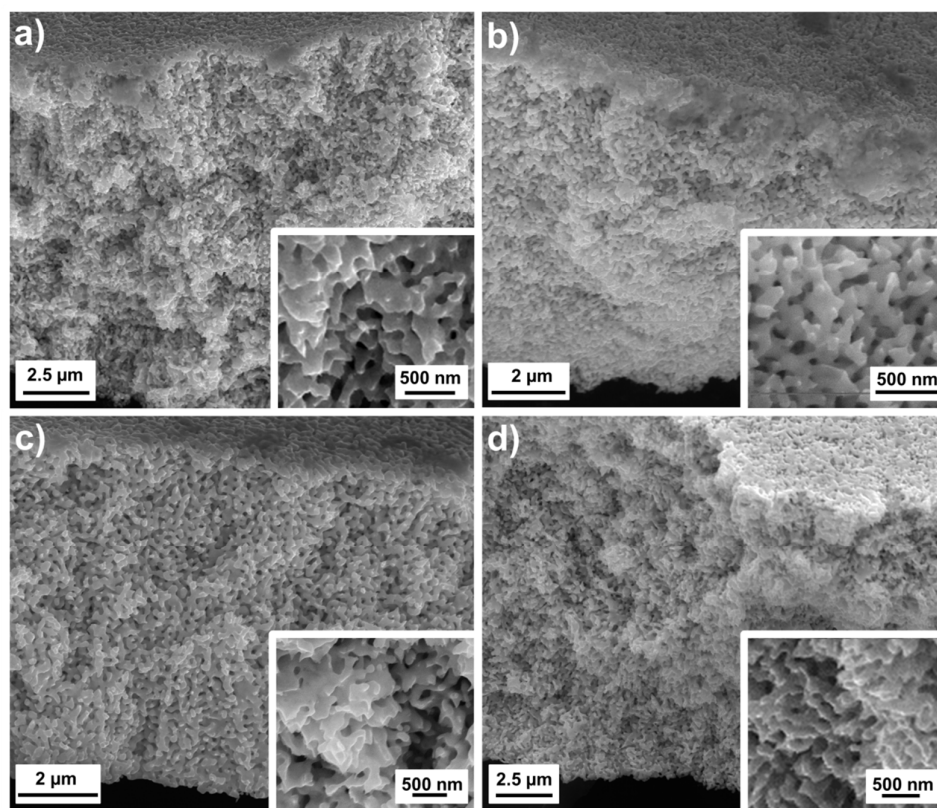

**Figure S1.** SEM-SE cross-sectional images of (a) NPG\_8h, (b) NPG\_12h, (c) NPG\_14h and (d) NPG\_16h with the insets showing magnified view of respective samples.
